# Supplementary material
Source: PubMed Central journal article supplement (PMC5693750)
Supplement: NIHMS910732-supplement-1.pdf [file NIHMS910732-supplement-1.pdf]

A.

Swi6 -----  
 Chp2 VKSADLDMNSIIISEDENFSPPPTVEEAENSINNKSSTASLESPOQNGSWHPSLYGLSV

Swi6 -----KKG-----VRSYRRSSTSKRSVIDDD---SE-PELPS  
 Chp2 PEKTHIQNSLDLYSHGNSGSQKTHNVSFSCAIRKVKSSKLSPI SNMEDSEDKKEDESSS

Swi6 MTKE-----AIAS-HKADSGSSDNEVESDHESKSSSKLKEN---AKEEEGEEEEED  
 Chp2 YKNEFKSSSSASVSSNFEEKTSGSDD-----HNSQS-PVPLNEGFEYIASSGSEDKNSDE

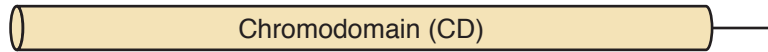

Swi6 EYVVEKVLKHRMARKGGGYEYLLKWEYDDPSDNTWSSEADCSGCKQLIEAYWNEHGGRP  
 Chp2 EFAVEMILDSRMKKDGSGFQYYLKWEGYDDPSDNTWNDEEDCAGCLELIDAYWESRGGKP

Swi6 EPSKRKRTARPKEPEKPSKSRKTDEDKHKDSNEKIEDVNEKTIKFADKSQEEFNEN  
 Chp2 DLSSLIRLTRSRRARSSNEASYVEKDESS-----NSD-----DSISYKRRRSRN----

Swi6 GPPSGQPNGHIESDNESKSPSQKESNESEDIQIAETPSNVTPKKKPSPEVPKLPDNRELT  
 Chp2 --AANRITDYVDSLDSESS-----MKEKQSKIE-----KYMKSDKSSKN

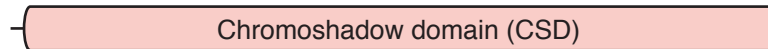

Swi6 VKQVENYDSWEDLVSSIDTIERKDDGTLEIYLTWKNGAISHHPSTIINKKCPQKMLQFYE  
 Chp2 FKPPFQKKSWE DLVDCVKTQQLDNGKLI AKIKWKNGYVSTHDNIIHQKCP LKII EY YE

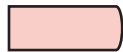

Swi6 S L T F R N E  
 Chp2 A H I K F T ----
