# Supplementary material
Source: PubMed Central journal article supplement (PMC5693750)

A.

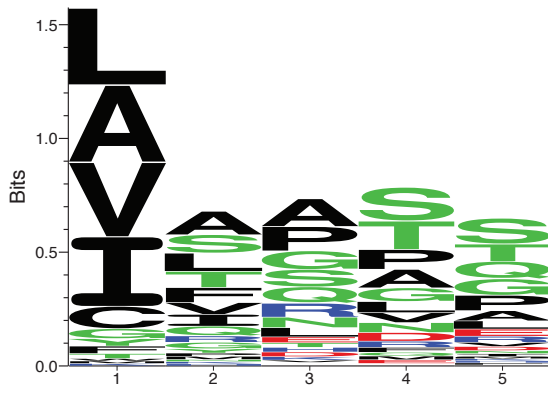

B.

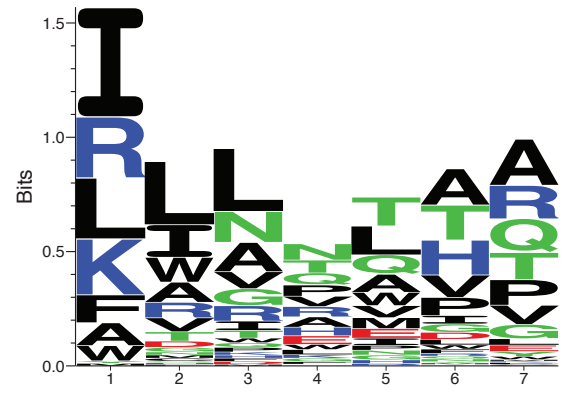

C.

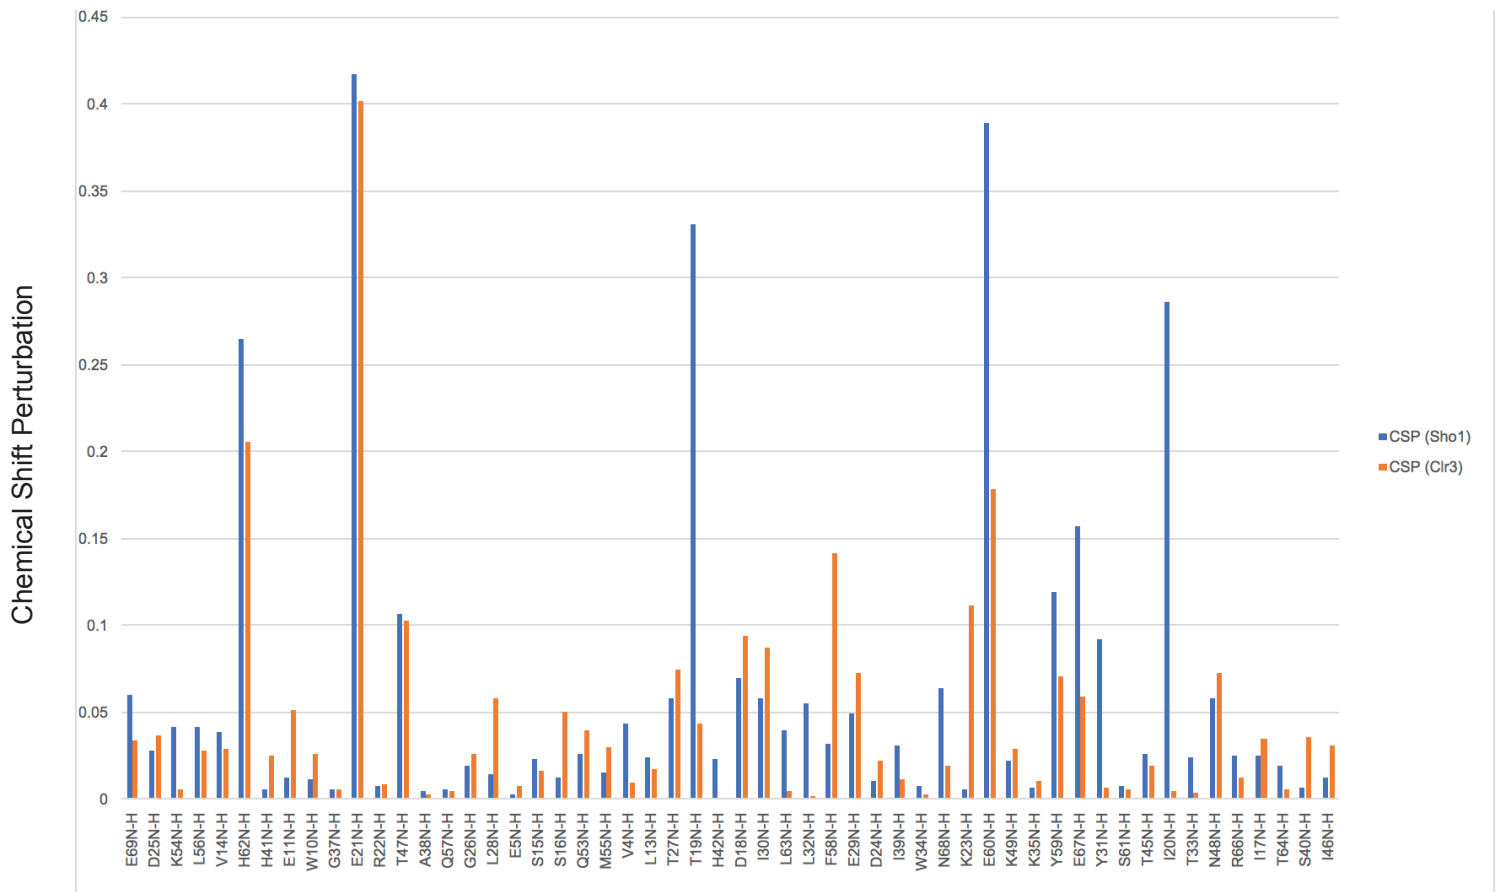

D.

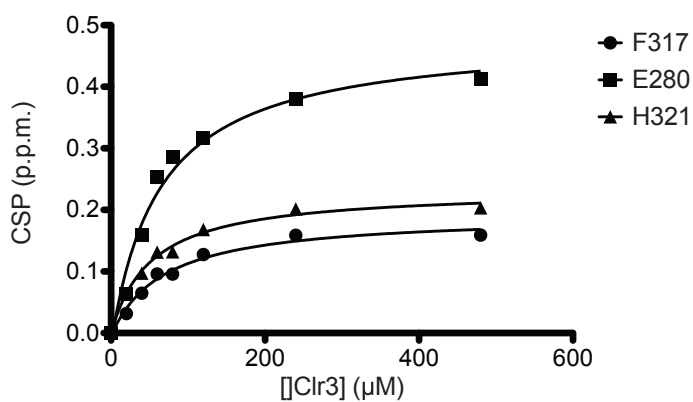

E.

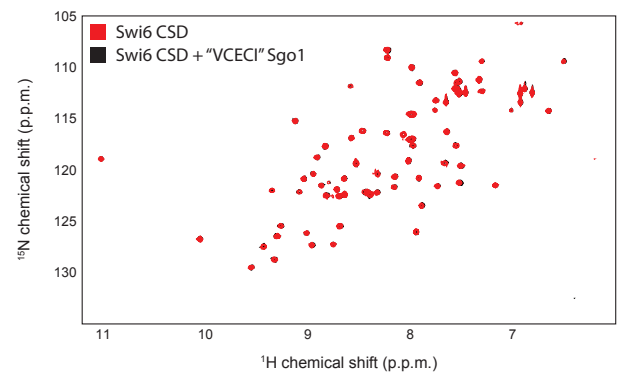

Supplement: NIHMS910732-supplement-2.pdf [file NIHMS910732-supplement-2.pdf]

A.

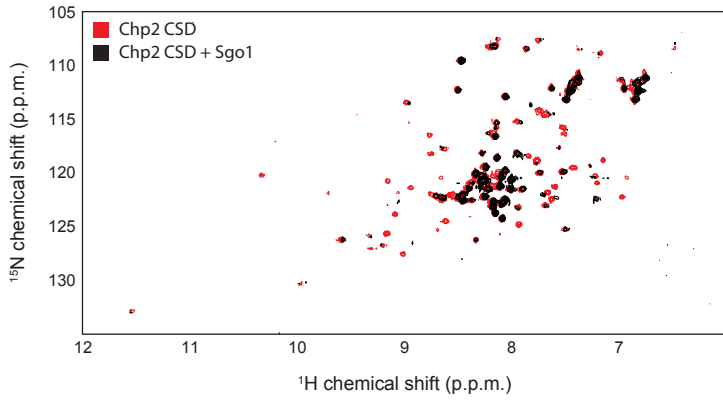

B.

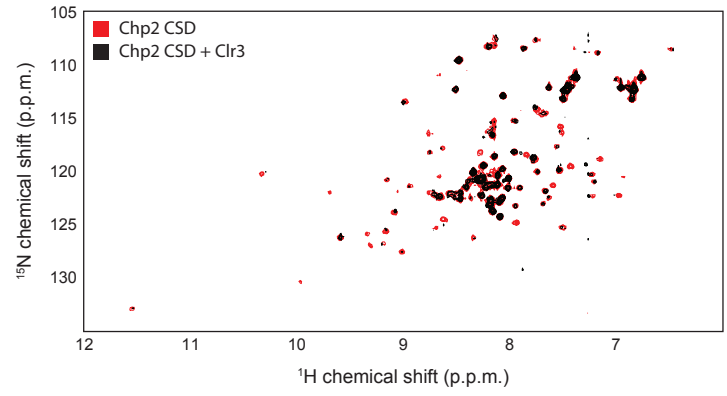

C.

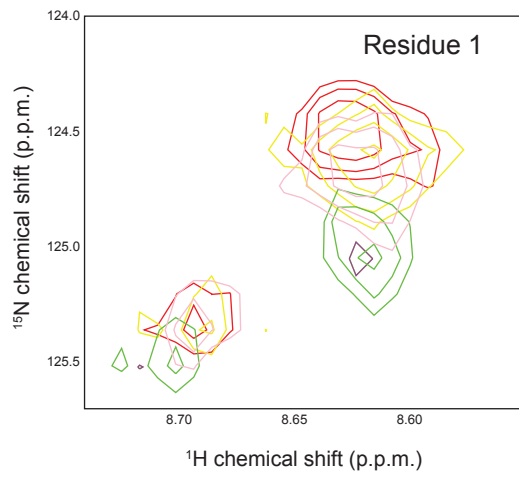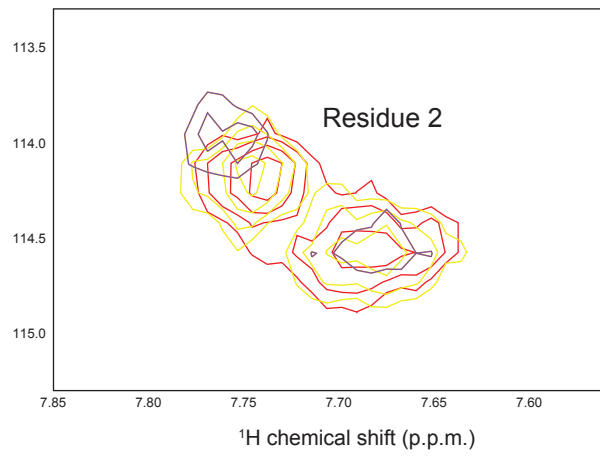

D.

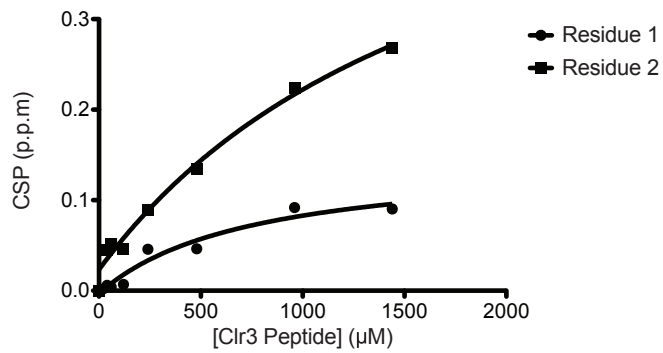

E.

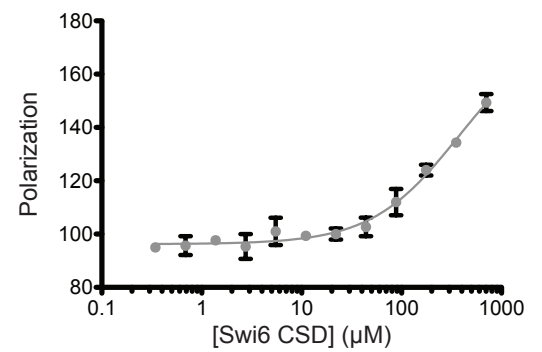

Supplement: NIHMS910732-supplement-3.pdf [file NIHMS910732-supplement-3.pdf]

A.

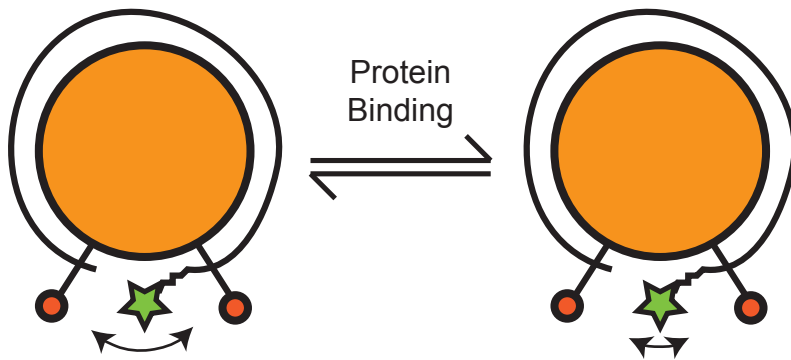

B.

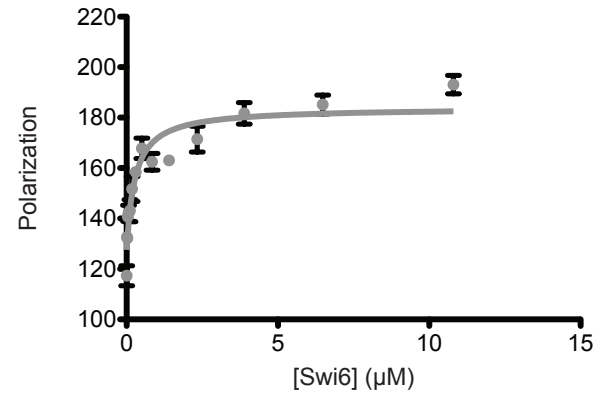

C.

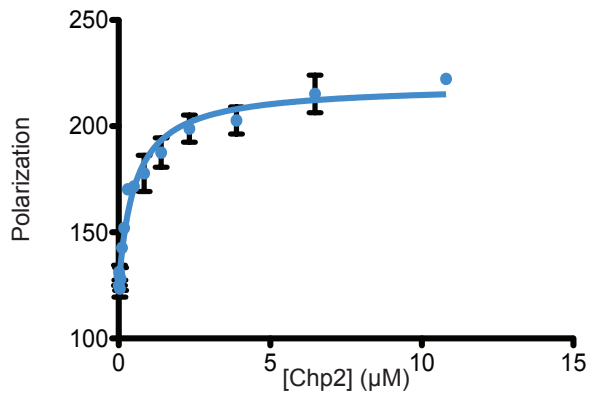

D.

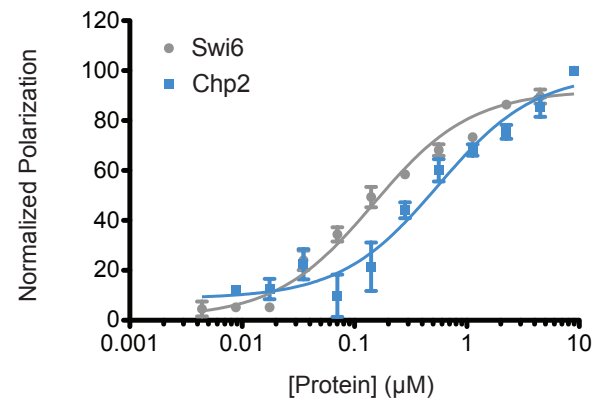

Supplement: NIHMS910732-supplement-4.pdf [file NIHMS910732-supplement-4.pdf]

A.

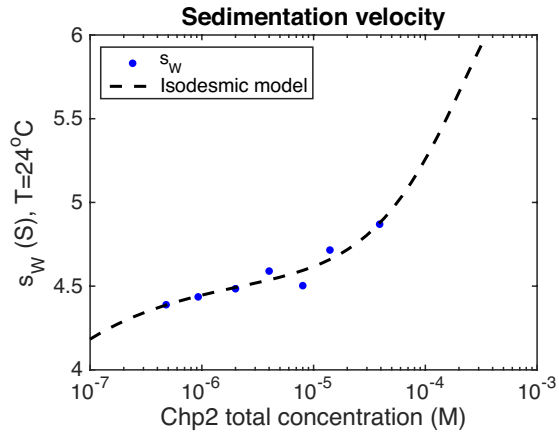

B.

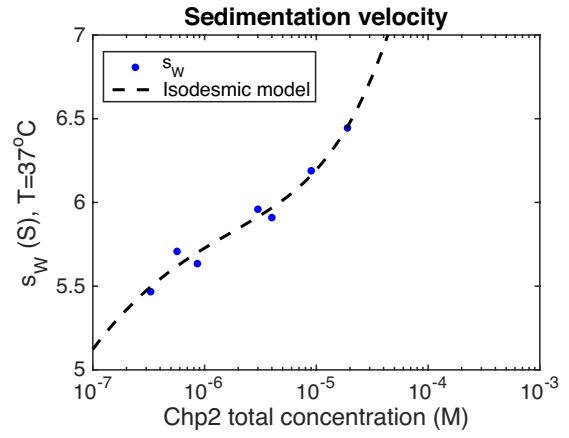

C.

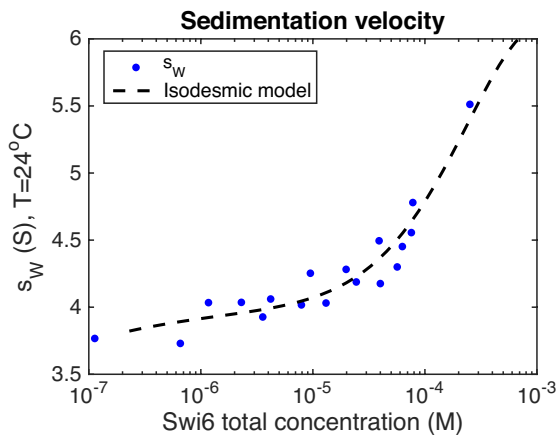

D.

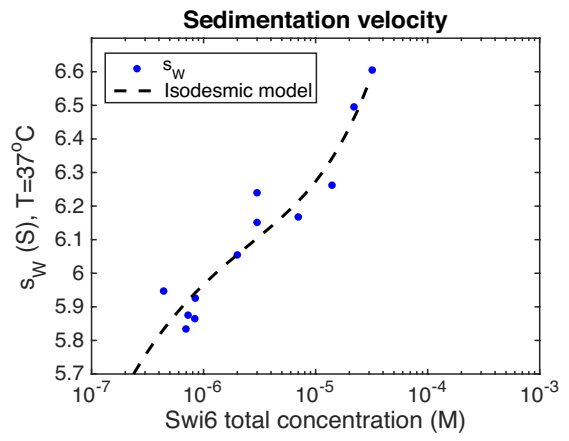

Supplement: NIHMS910732-supplement-5.pdf [file NIHMS910732-supplement-5.pdf]

A.

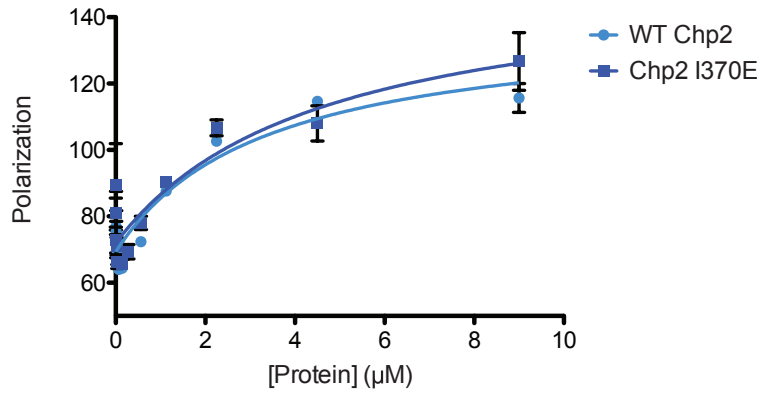

B.

## Chp2 2D Class Averages

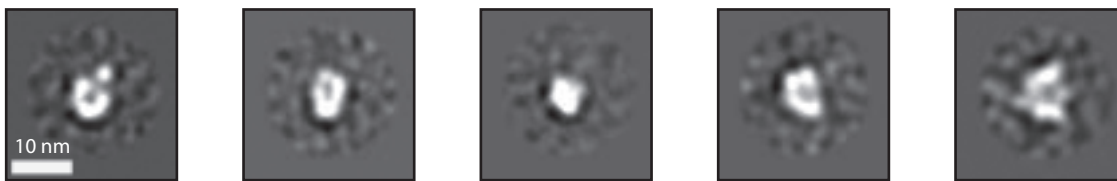

C.

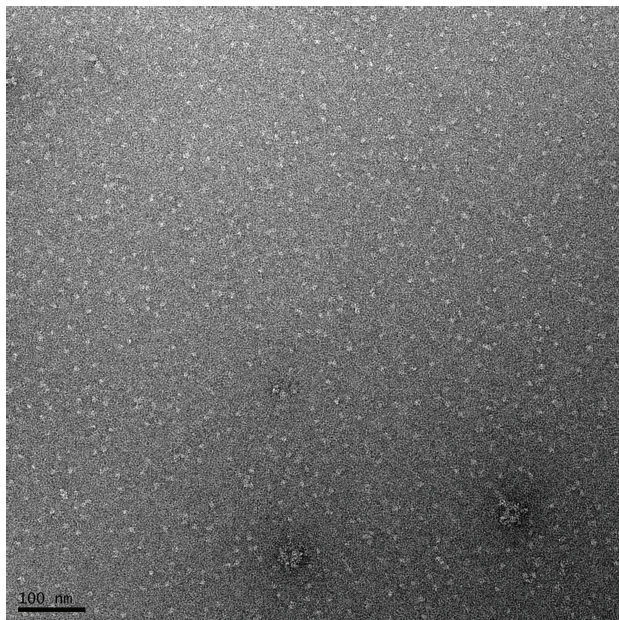

Supplement: NIHMS910732-supplement-6.pdf [file NIHMS910732-supplement-6.pdf]
